# Supplementary material for: Origin of metastable oligomers and their effects on amyloid fibril self-assembly
Source: Royal Society of Chemistry journal article supplement (doi:10.1039/c8sc01479e), 2018-01-01
Supplement: c8sc01479e1.pdf [file c8sc01479e1.pdf]

## Electronic supplementary information

### Origin of Metastable Oligomers and their Effects on Amyloid Fibril Self-Assembly

Filip Hasecke,<sup>‡a</sup> Tatiana Miti,<sup>‡b</sup> Carlos Perez,<sup>b</sup> Jeremy Barton,<sup>b</sup> Daniel Schölzel,<sup>ac</sup> Lothar Gremer,<sup>ac</sup> Clara S.R. Grüning,<sup>a</sup> Garrett Matthews,<sup>b</sup> Georg Meisl,<sup>d</sup> Tuomas P.J. Knowles,<sup>d</sup> Dieter Willbold,<sup>ac</sup> Philipp Neudecker,<sup>ac</sup> Henrike Heise,<sup>ac</sup> Ghanim Ullah,<sup>b</sup> Wolfgang Hoyer<sup>\*ac</sup> and Martin Muschol<sup>\*b</sup>

<sup>a</sup>Institut für Physikalische Biologie, Heinrich-Heine-Universität, 40204 Düsseldorf, Germany. E-mail: wolfgang.hoyer@hhu.de

<sup>b</sup>Department of Physics, University of South Florida, Tampa, FL 33620, USA. E-mail: mmuschol@usf.edu

<sup>c</sup>Institute of Complex Systems (ICS-6), Structural Biochemistry, Research Centre Jülich, Germany.

<sup>d</sup>Department of Chemistry, University of Cambridge, Lensfield Road, Cambridge CB2 1EW, UK.

#### Contents

- Materials and methods
- Figure S1: The conformation of monomeric A $\beta$ 40 is retained in dimA $\beta$
- Figure S2: Both A $\beta$  subunits of dimA $\beta$  are incorporated into the RF  $\beta$ -sheet core
- Figure S3: DimA $\beta$  possesses higher thermodynamic stability in the RF state than in the ZA $\beta$ <sub>3</sub>-bound state
- Kinetic model of competing oligomer and fibril pathways
- Figure S4: Kinetic model
- Figure S5: RF kinetics with and w/o prior monomer hydrolysis

## Materials and methods

### Protein and chemicals

Two times recrystallized, dialyzed, and lyophilized hewL was purchased from Worthington Biochemicals (Lakewood, NJ) and used for all experiments. Ultrapure grade ThT was obtained from Anaspec (Freemont, CA) and standard grade ThT from Sigma Aldrich. All other chemicals were from Fisher Scientific (Pittsburgh, PA) and were reagent grade or better.

### Preparation of hewL solutions

HewL was dissolved at twice its final concentration in 25 mM  $\text{KH}_2\text{PO}_4$  pH 2 buffer and was placed in a water bath for 3 minutes at 42 °C to help dissolve preformed assemblies. Samples were successively filtered through 220 nm nitrile (Fisherbrand, Fisher Scientific, Pittsburgh, PA) and 50 nm polyethersulfone (Tisch Scientific, North Bend, OH) pore size syringe filters. The concentrated hewL stock was mixed 1:1 with a NaCl/25 mM  $\text{KH}_2\text{PO}_4$  pH 2 stock solution at double the desired final salt concentrations. Final lysozyme concentrations were determined from UV absorption measurements at 280 nm ( $\epsilon_{280} = 2.64 \text{ mL mg}^{-1} \text{ cm}^{-1}$ ).

### Preparation of DimA $\beta$

Following a strategy previously established for recombinant production of A $\beta$ ,<sup>1</sup> bacterial expression of dimA $\beta$  was achieved by co-expression of ZA $\beta$ 3, a binding protein that shields aggregation-prone sequence segments of A $\beta$ . The gene encoding dimA $\beta$ , including an N-terminal methionine, followed by a A $\beta$ 40 unit, a (G<sub>4</sub>S)<sub>4</sub> linker, and a second A $\beta$ 40 unit, was obtained from Life Technologies, and was cloned into the pACYCDuet-1 vector for co-expression with the ZA $\beta$ 3 gene using NcoI and HindIII restriction sites. The coexpression vector contains the genes for dimA $\beta$  and (His)<sub>6</sub>-tagged ZA $\beta$ 3 in the following order: T7promoter-1 – dimA $\beta$  – T7promoter-2 – (His)<sub>6</sub>ZA $\beta$ 3 – T7 terminator. The protein was expressed as described.<sup>1</sup>

For purification, cell pellets were resuspended in 50 mM Na-phosphate, 0.3 M NaCl, 20 mM imidazole, pH 8, containing EDTA-free protease inhibitor (Roche Applied Sciences) and lysed by a cell disrupter (Constant Systems). The cell debris was removed by centrifugation in a Beckman J2-21 centrifuge mounting a JA20.1 rotor at 18,000 RPM, 4 °C for 40 minutes. For capture of the dimA $\beta$ :ZA $\beta$ 3 complex by immobilized metal ion affinity chromatography (IMAC), the supernatant was loaded on a HisTrap FF column (GE Healthcare). DimA $\beta$  was separated from the resin-bound ZA $\beta$ 3 and eluted with 8 M urea, 20 mM Na-phosphate, pH 7. For further purification, including removal of residual ZA $\beta$ 3, reverse phase high-performance liquid chromatography (RP-HPLC) was performed. For this purpose the IMAC eluate was concentrated in a Vivaspin 20 centrifugal concentrator (Sartorius), followed by addition of 5 mM TCEP to reduce the disulfide bond of ZA $\beta$ 3, and loading onto a semi-preparative Zorbax 300SB-C8 RP-HPLC column (9.4 mm × 250 mm, Agilent) connected to an Agilent 1260 Infinity system with UV detection at 214 nm. Monomeric dimA $\beta$  was eluted in a gradient from 30% (v/v) to 36% acetonitrile in water, 0.1% (v/v) trifluoroacetic acid at 80 °C. DimA $\beta$  containing fractions were pooled, lyophilized, dissolved in HFIP, aliquoted in 1 mg portions, lyophilized again, and stored at -20 °C. Immediately before use in experiments, lyophilized dimA $\beta$  was reconstituted in 6 M guanidinium-HCl, 50 mM Na-phosphate, 50 mM NaCl, pH 7.4, and sonicated for 30 minutes in a sonicator bath. Subsequently, the solution was loaded onto a Superdex 75 10/300 GL column (GE Healthcare) equilibrated with 35 mM  $\text{Na}_2\text{HPO}_4$ , 50 mM NaCl, 5 mM NaOH, pH 11.

DimA $\beta$  eluted at 13.5 ml. Protein concentration was determined by spectrophotometry. Immediately before the start of an experiment, 1.5% 1 M NaH<sub>2</sub>PO<sub>4</sub> was added, yielding 50 mM Na-phosphate, 50 mM NaCl, pH 7.4, as final buffer.

### **Atomic force microscopy**

For imaging of hewL assemblies, 50  $\mu$ L of sample solutions were diluted 20-100 fold into the same solvent used during growth, deposited onto freshly cleaved mica for 3 minutes, rinsed with deionized water and dried with dry nitrogen. Amyloid fibrils were imaged in air with a MFP-3D atomic-force microscope (Asylum Research, Santa Barbara, CA) using NSC36/NoAl (Mikromasch, San Jose, CA) or PFP-FMR-50 (Nanosensor, Neuchatel, Switzerland) silicon tips with nominal tip radii of 10 and 7 nm, respectively. The cantilever had a typical spring constant and resonance frequency of 2 nN/nm and 80 kHz, respectively. It was driven at 60–70 kHz in alternating current mode and at a scan rate of 0.25-0.75 Hz. Images were acquired at 512  $\times$  512 pixel resolution. Raw image data were corrected for image bow and slope. Amplitude, phase, and height images were collected for areas of 5x5  $\mu$ m.

For imaging of dimA $\beta$  assemblies, 25  $\mu$ L of sample solutions were directly deposited onto freshly cleaved mica for 1 minute, rinsed with deionized water and dried with dry nitrogen. Imaging was performed in air with a NanoWizard 2 (JPK instruments) with OMCLAC160TS silicon cantilevers (Olympus) with a nominal tip radius of 7 nm. The cantilever had a typical spring constant and resonance frequency of 26 nN/nm and 300 ( $\pm$ 100) kHz, respectively. It was driven at 250–370 kHz in intermittent contact mode and at scan rates of 0.5-1.0 Hz. Images were acquired at 1024  $\times$  1024 pixel resolution. Raw image data were corrected for image bow and slope. Amplitude, phase, and height images were collected for areas of 2x2 or 10x10  $\mu$ m. Height images were superimposed over either amplitude or phase images using Gimp – GNU Image Manipulation Program.

### **Circular dichroism spectroscopy**

Far-UV CD spectra of dimA $\beta$  were measured on a JASCO J-815 spectropolarimeter at a protein concentration of 20  $\mu$ M in 1 mm Suprasil Quartz cuvettes (Hellma). To obtain a spectrum of monomeric dimA $\beta$  the sample was measured at 4°C, immediately after elution of the monomer fraction from SEC. The spectrum of dimA $\beta$  in the gO/CF state was recorded at 20°C, after 24 hours of quiescent incubation in 50 mM Na-phosphate, 50 mM NaCl, pH 7.4. The gO/CF state of the sample was confirmed by AFM.

### **Thioflavin T (ThT) fluorescence-monitored amyloid formation**

ThT stock solutions were prepared by dissolving 1 mM dye in distilled water and then filtering through 220 nm syringe filters. Final ThT concentrations were obtained from absorption at  $\lambda$  = 412 nm ( $\epsilon_{412}$  = 32 000 M<sup>-1</sup> cm<sup>-1</sup>).

HewL amyloid growth kinetics measurements with ThT were performed using a SpectraMax M5 fluorescence plate reader (Molecular Devices). ThT fluorescence was excited at 440 nm, and emission collected at 488 nm. Protein solutions at concentrations ranging from 0.3 mg/ml (21  $\mu$ M, below the COC) to 5 mg/ml (350  $\mu$ M, above the COC) were incubated in the presence of either 450 or 500 mM NaCl. Protein concentrations were more closely spaced near the COC for a given salt concentration, and more widely spaced above the COC. Typically, six identical 300  $\mu$ L samples were incubated in a 96 well plate at 52 °C.

ThT at final concentrations of 5-10  $\mu\text{M}$  was added to each well. Measurements were taken every 20 minutes and the plate was shaken for 3 seconds before each measurement.

DimA $\beta$  amyloid growth kinetics measurements were performed using an Infinite M200 Pro fluorescence plate reader (Tecan) with ThT excitation at 445 nm, and emission collected at 482 nm. Protein concentrations ranged from 0.6  $\mu\text{M}$  (below the COC) to 40  $\mu\text{M}$  (above the COC) in 50 mM Na-phosphate, 50 mM NaCl, pH 7.4. Typically, three identical 100  $\mu\text{L}$  samples were incubated in a 96 well plate at 37  $^{\circ}\text{C}$ . ThT at final concentrations of 100  $\mu\text{M}$  was added to each well. Measurements were taken every 3 minutes and the plate was shaken for 2 seconds before each measurement. The slow thermal equilibration of the multiwell plates causes an initial decrease in ThT fluorescence, which is equally present in ThT/buffer control wells. This thermal transient was either removed from the traces (lysozyme) or ignored for the analysis of the more rapidly assembling dimA $\beta$  samples.

### Determination of the COC

We frequently refer to the COC, which is the phase boundary for the onset of gO/CF formation in both hewL and dimA $\beta$ . For hewL, we relied on our prior measurements of a sharp transition in ThT and light scattering kinetics from traces with extended lag periods to the onset of a lag-free drift.<sup>2</sup> This transition coincided with a sudden switch in aggregate morphology from RFs past the lag period to immediate presence of gOs and CFs. In addition, we showed that pre-formed gO/CFs grew above and decayed below the COC and that RFs seeded above the COC continued to grow. These measurements indicated that the COC is a (metastable) phase boundary, and the resulting phase diagram is shown in Fig. 1B. For dimA $\beta$ , the COC was similarly taken as the concentration for which ThT kinetics transitioned from pure sigmoidal to weakly bimodal kinetics - again reflecting the lack of a lag period for gO/CF formation.

### Data analysis of ThT kinetics

The sigmoidal kinetics of RF formation in the absence of oligomers (below the COC) was fit to the analytical approximation of nucleated polymerization with secondary nucleation mechanisms.<sup>3</sup> Specifically, in the absence of fibril seeding

$$M_{RF}(t) = M_0[1 - \exp(C_- e^{-\kappa t} - C_+ e^{+\kappa t} + \frac{\delta^2}{\kappa^2})] \quad (1)$$

where  $M_{RF}$  is the fibril mass,  $M_0$  the total protein concentration,  $C_{\pm} = \pm(\delta/2\kappa)^2$ , and  $\delta$  and  $\kappa$  represent the primary and secondary nucleation rates.

The biphasic kinetics of dimA $\beta$  and hewL, in turn, were fit to a superposition of a one-step oligomerization reaction and the above nucleated-polymerization reaction. For dimA $\beta$ , the time regimes of dominant gO/CF formation and dominant RF formation were sufficiently separated to allow separate analysis of the gO/CF assembly kinetics. Two alternative reaction models were fit to gO/CF kinetics in the initial time regime, namely primary nucleation-growth and one-step oligomerization. For a match to primary nucleation-growth the expression for classical nucleated polymerization was used<sup>4</sup>

$$M_{gO/CF}(t) = M_0[1 - \text{sech}^{2/n_c}(\sqrt{n_c k_n k_+ M_0^{n_c}} t)] \quad (2)$$

with  $M_{gO/CF}(t)$  the mass concentration of polymer,  $M_0$  the total protein concentration,  $k_n$  the nucleation rate constant,  $k_+$  the elongation rate constant, and  $n_c$  the critical nucleus size. Global fits to the concentration-dependent gO/CF formation were performed with  $n_c$  and the product  $k_n k_+$  as shared fit parameters. For one-step oligomerization  $n M \rightarrow M_n$ , the mass concentration of oligomer,  $M_{gO/CF}$ , evolves in time according to the following expression

$$M_{gO/CF}(t) = M_0 - [M_0^{1-n} + (n-1)nkt]^{1/(1-n)} \quad (3)$$

with  $M_0$  the total protein concentration,  $k$  the oligomerization rate constant, and  $n$  the oligomer size or reaction order. Global fits to the concentration-dependent gO/CF formation data were performed with  $n$  and  $k$  as shared fit parameters. For both fits, the proportionality constant relating  $M(t)$  to ThT fluorescence intensity was treated as a fit parameter with an individual value for every sample.

In the case of hewL, the time scales for gO/CF and RF formation overlapped, particularly at monomer concentrations just slightly above the COC. We therefore fit the data to the superposition of the above nucleated polymerization reaction (eqn. 1) and an oligomerization reaction. In addition, the initial hewL oligomerization kinetics were better approximated using a 1<sup>st</sup>-order forward reaction with an exponential growth in time.

$$M_{gO,CF}(t) = M_\infty(1 - \exp(-at)) \quad (4)$$

where  $M_{gO/CF}(t)$  is the mass concentration of oligomer, and  $M_\infty$  is the gO/CF mass that would be reached in the absence of RF formation. The neglect of a backward rate for oligomers is justified by two observations. First of all, we had previously shown that gO/CF decay rates are exceedingly small.<sup>2</sup> In addition, as discussed below, CFs did not fully depolymerize for many days after RFs had nucleated.

### Determination of lag periods

We defined the RF lag time as the point at which the amplitude of the RF portion of the ThT signal increases beyond a fixed threshold. To determine RF lag periods below the COC (sigmoidal growth) ThT kinetics were directly fit to Eqn. (1). Above the COC (biphasic growth) our kinetics data were fit as the superposition of oligomeric and RF growth, as described above. The oligomeric fits were then subtracted from the entire time traces, resulting in the RF portion of the ThT signal. RF lag periods were then determined as below the COC. In both cases, using semi-logarithmically scaled ThT intensities significantly improves visual detection for deviations of ThT kinetics from its flat baseline and onset of significant RF growth. Error bars for individual lag periods (see Figs. 5E & F), which are derived from analytical fits to individual kinetic traces, are difficult to assign. However, the scatter among the data points is a reasonable measure of underlying experimental and fitting uncertainties. The uncertainty in the slope of the resulting power law fit through the lag periods, as well as the average of the slopes for three independent repeats of these experiments, is provided in the figure caption.

### Stability assessment of dimA $\beta$ assembly states by ZA $\beta$ 3

The affibody protein ZA $\beta$ 3 and its tryptophan-containing derivative ZA $\beta$ 3W were prepared as described previously.<sup>5,6</sup> To monitor the stability of dimA $\beta$  assemblies formed during ThT assays, 14  $\mu$ M ZA $\beta$ 3

was added to assembly reactions of 6  $\mu\text{M}$  dimA $\beta$  at different time points, and ThT fluorescence was recorded. To test if RFs of dimA $\beta$  are thermodynamically or only kinetically stable against dissolution in the presence of ZA $\beta$ 3, 15  $\mu\text{M}$  preformed dimA $\beta$ :ZA $\beta$ 3W complex was incubated over one week in the presence of 48  $\mu\text{M}$  (in monomer equivalents) sonicated dimA $\beta$  RF seeds and the wavelength of maximum tryptophan fluorescence emission was recorded as previously described.<sup>6</sup>

### Modeling of biphasic assembly kinetics

To replicate the experimentally observed transition from sigmoidal to biphasic growth we performed numerical simulations for fibril growth in the presence of off-pathway aggregation. To do so we modified the model of Powers and Powers (for details, see ref. 7) in three ways. We (i) accounted for secondary nucleation of fibril growth; (ii) replaced the off-pathway amorphous precipitates with off-pathway oligomers that could only form after crossing a well-defined solubility threshold we had previously identified;<sup>2</sup> and again following our experimental results, we (iii) assumed that RF fibrils, once nucleated, elongate faster than gO/CFs grow. A more detailed description of this model is provided further below.

To connect ThT responses to the kinetics of gO/CF vs. RF formation, we built on our prior measurements indicating that ThT responses to gO/CFs are weaker than to equivalent concentrations of RFs (about ten times in the case of hewL).<sup>8</sup> We further considered the ThT fluorescence to be the linear superposition of the response evoked by gO/CFs and RFs, each with their distinct response factors, i.e.

$$\Delta ThT = \alpha [gO, CF] + \beta [RF]$$

The fits used  $\alpha$ ,  $\beta$  as global fitting parameters for a given protein. This implicitly assumes that binding of ThT to gO/CFs and RFs remains linear over the range of concentrations we consider.

### Assessing role of hewL hydrolysis

We have previously shown that hewL hydrolysis under our growth conditions requires in excess of 18 hours to generate distinct peptide fragments (see Fig. 4 in ref. 8). Since gO/RF formation is lag-free and the total amounts of gO/CFs formed at the plateau phase matched monomer concentrations above the COC (see ref. 2), hydrolysis is unlikely to underlie gO/CF formation in our system. In contrast, RF formation does show lag periods that stretch into the time frame for weak hewL hydrolysis. To investigate whether hydrolysis does affect RF formation under our growth conditions, we pre-hydrolyzed 20 mg/ml of hewL monomers in 25 mM  $\text{KH}_2\text{PO}_4$  buffer (RF growth conditions) for either 3 or 7 days at 45 °C, i.e. slightly below the threshold temperature of 50 °C for any amyloid aggregation.

### NMR spectroscopy

For solution NMR spectroscopy, [U-<sup>15</sup>N]-dimA $\beta$  was freshly eluted in 20 mM Na-phosphate, 50 mM NaCl, pH 10, from a Superdex 75 10/300 column (GE Healthcare). 375  $\mu\text{l}$  eluate at ca. 130  $\mu\text{M}$  protein concentration was diluted with 75  $\mu\text{l}$  of 20 mM  $\text{NaH}_2\text{PO}_4$ , 50 mM NaCl, and 50  $\mu\text{l}$   $\text{D}_2\text{O}$  to a final [U-<sup>15</sup>N]-dimA $\beta$  concentration of ca. 100  $\mu\text{M}$ . The solution had a pH of 7.9. For comparison with dimA $\beta$ , [U-<sup>15</sup>N]-A $\beta$ 40 was prepared with an N-terminal methionine as described previously.<sup>1</sup> Solution NMR data were collected at 5 °C using a 600 MHz spectrometer (Varian). [<sup>1</sup>H,<sup>15</sup>N]-HSQC spectra were collected at 5.0 °C on a Bruker AVANCE III HD 600 MHz or Varian VNMRs 900 MHz NMR spectrometer equipped with cryogenic probes with z-axis pulsed field gradient capabilities.

For solid-state NMR spectroscopy, [U-<sup>15</sup>N-<sup>13</sup>C]-dimAβ was freshly eluted in 20 mM Na-phosphate, pH 10, from a Superdex 75 16/60 column (GE Healthcare). To form RFs samples were incubated in 5 ml Qalivials (Zinsser). 1035 μl isotopically labeled dimAβ were mixed with 3915 μl 20 mM Na-phosphate, 50 mM NaCl, pH 7.4, and 50 μl 10% NaN<sub>3</sub>. The vials were incubated at 37 °C while being stirred with a micro stir bar. After 20 h of incubation fibril formation was confirmed by AFM analysis. The remaining sample was centrifuged for 10 min at 16.100 x g at 4 °C, and the pellet was centrifuged into a 3.2 mm MAS NMR rotor. MAS NMR spectra were recorded at sample temperatures of 25 °C ± 5 °C (INEPT spectrum, Fig. S2B) and 0 °C ± 5 °C (PDS spectrum with CP excitation, Fig. S2C), respectively on a 14.1 T (<sup>1</sup>H Larmor frequency: 600 MHz) spectrometer (Varian). NMR data were processed with NMRPipe<sup>9</sup> using squared and shifted sine bell functions for apodization and analyzed with CcpNmr.<sup>10</sup>

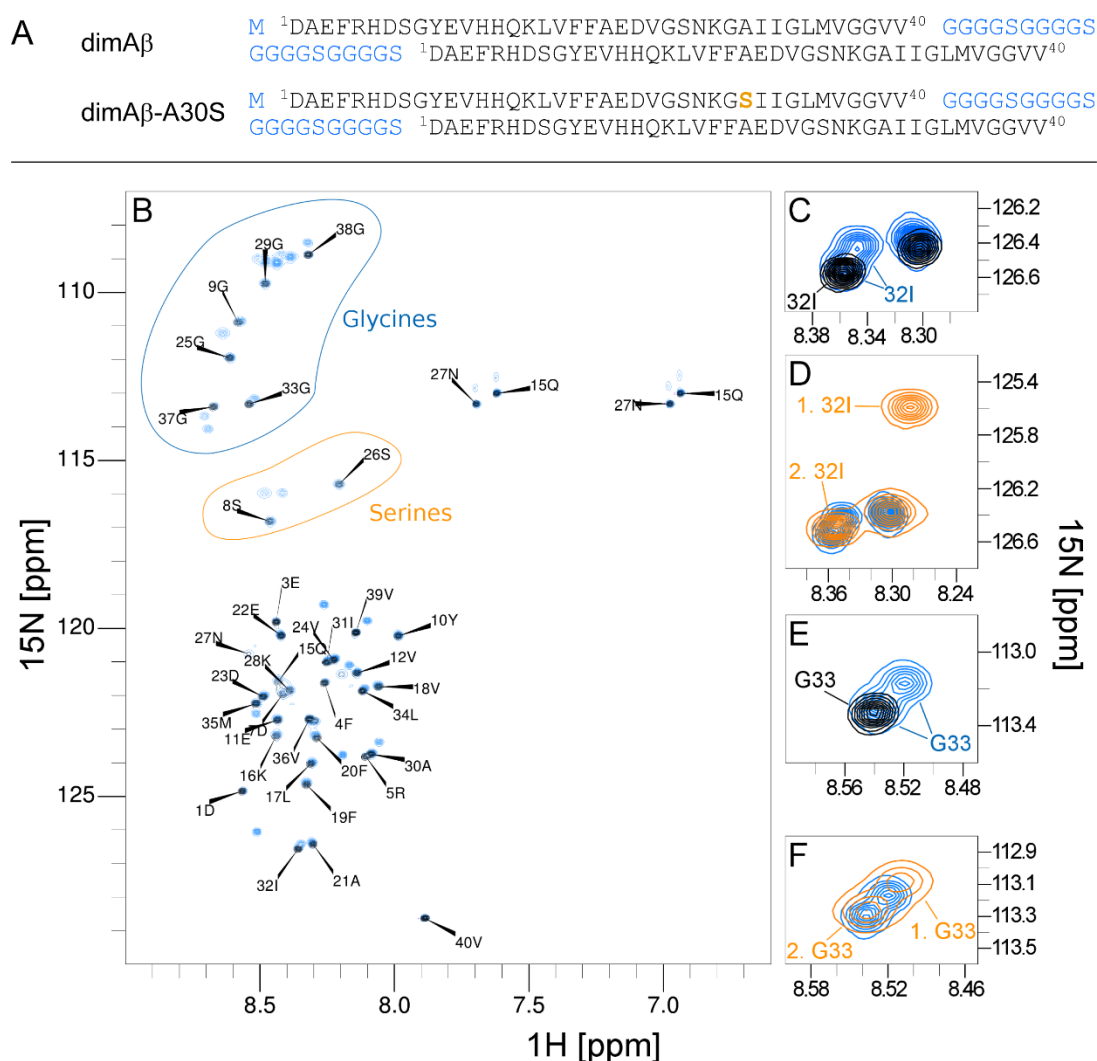

**Figure S1. The conformation of monomeric A $\beta$ 40 is retained in dimA $\beta$ .** To assess differences in conformation, solution NMR spectra of monomeric A $\beta$ 40 were compared to those of monomeric dimA $\beta$  and the mutant dimA $\beta$ -A30S. **(A)** Amino acid sequences of dimA $\beta$  and dimA $\beta$ -A30S. DimA $\beta$ -A30S contains an Ala-to-Ser exchange at position 30 of only the first A $\beta$ 40 unit, in order to locally perturb the NMR spectrum and abolish spectral overlap of the two A $\beta$ 40 units. **(B)** Overlay of (<sup>1</sup>H-<sup>15</sup>N) HSQC NMR spectra of [U-<sup>15</sup>N]-A $\beta$ 40 (black) and [U-<sup>15</sup>N]-dimA $\beta$  (blue). Assignments are shown for A $\beta$ 40. In the spectrum of [U-<sup>15</sup>N]-dimA $\beta$  the resonances of A $\beta$ 40 are recovered, indicating that the conformation of monomeric A $\beta$ 40 is retained in dimA $\beta$ . In addition, further peaks are observed mainly in the glycine and serine regions of the spectrum and can be attributed to the (G<sub>4</sub>S)<sub>4</sub> linker. For some resonances in the central/C-terminal region of the A $\beta$  sequence, e.g., Ile-32 and Gly-33, peak splittings are evident in the spectrum of dimA $\beta$  **(C,E)**. To evaluate if the peak splittings originate from a symmetric interaction between both A $\beta$  units, or if it is due to the asymmetric placement of the A $\beta$  units within dimA $\beta$  (preceding vs. following the linker), the variant dimA $\beta$ -A30S was generated and compared to dimA $\beta$ . In dimA $\beta$ -A30S (orange spectrum), one of the two split resonances observed for dimA $\beta$  is shifted as a consequence of local perturbation by the A30S mutation **(D,F)**. This indicates that the peak splittings are not due to a symmetric interaction between both A $\beta$  units, as in this case quadruple peaks would be expected for Ile-32 and Gly-33. Instead, specifically the one dimA $\beta$  resonance is shifted in dimA $\beta$ -A30S **(D,F)** that does not overlay with the A $\beta$ 40 resonance **(C,E)**. This suggests that the peak splittings in dimA $\beta$  result from a slightly altered electronic environment of the central/C-terminal region in the N-terminal A $\beta$  unit within dimA $\beta$ , likely resulting from proximity to, or transient interaction with, the linker region.



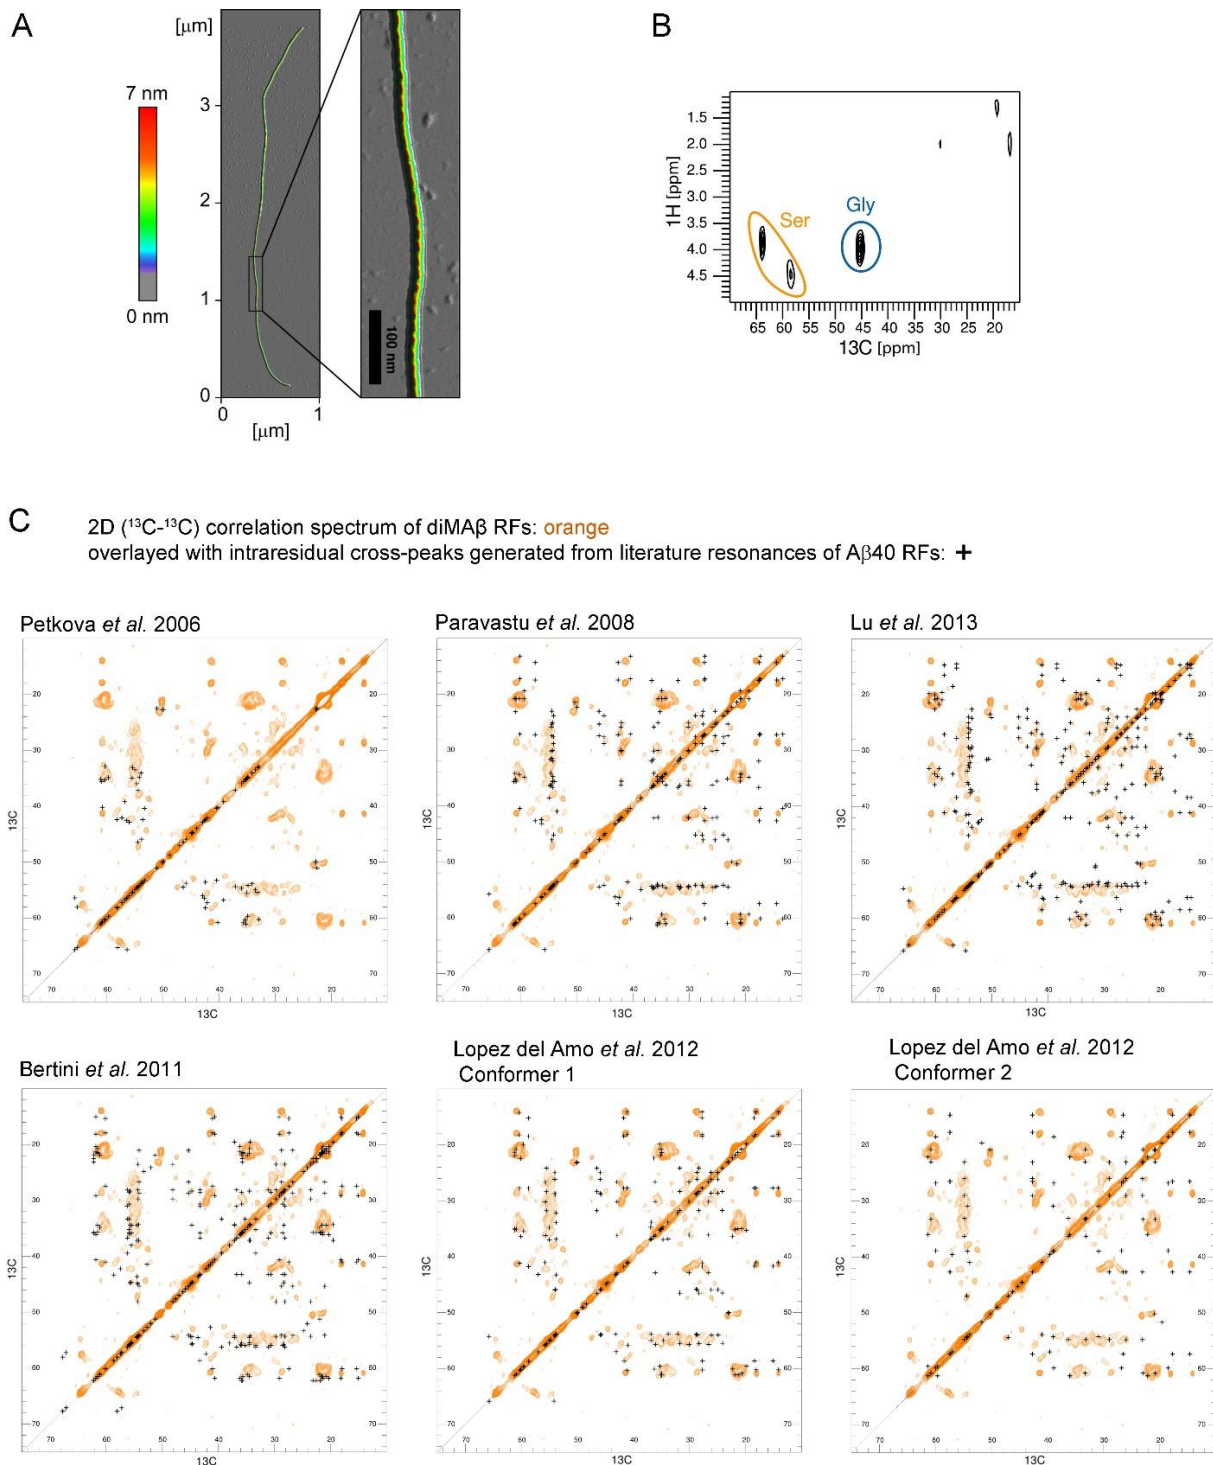

**Figure S2. Both Aβ subunits of dimAβ are incorporated into the RF β-sheet core.** (A) AFM image of a dimAβ RF. Color scale: height in nm. (B) 2D ( $^1\text{H}$ - $^{13}\text{C}$ ) HETCOR spectrum obtained with refocused INEPT as magnetization transfer<sup>11</sup> of diAβ RFs. Only signals from mobile regions of the fibrils are detected.<sup>12</sup> Almost exclusively signals from glycine and serine residues (encircled) in diAβ RFs are visible, indicating that the (G<sub>4</sub>S)<sub>4</sub> linker remains flexible, while both Aβ units are incorporated into the RF β-sheet core. The sample temperature was  $\sim 25^\circ\text{C} \pm 5^\circ\text{C}$ , the MAS spinning speed was 11 kHz. For the 2D spectrum, 64  $t_1$  increments with 32 scans each were recorded. During  $^{13}\text{C}$  detection, high-power proton decoupling ( $\sim 83$  kHz) was applied. (C) 2D ( $^{13}\text{C}$ - $^{13}\text{C}$ ) correlation spectrum of diAβ RFs (orange) overlayed with intrareidual cross-peaks generated from resonances previously reported for six preparations of Aβ<sub>40</sub> RFs (crosses). Initial proton to carbon magnetization transfer was achieved by cross polarization with a contact time of 200 μs,

homonuclear mixing was achieved by proton driven spin diffusion with a mixing time of 50 ms. High-power proton decoupling ( $\sim 83$  kHz) was employed during  $^{13}\text{C}$  evolution and detection periods. Sample temperature was  $\sim 0^\circ\text{C} \pm 5^\circ\text{C}$ , the spinning speed was 11 kHz. In total 256  $t_1$  increments with 128 scans each were recorded. MAS NMR was performed at a magnetic field strength of 14.1 T corresponding to a proton Larmor frequency of 600 MHz. Spectra were processed using squared and shifted sine-bell apodization (shift of  $0.35 \cdot \pi$ ). The A $\beta$ 40 RF literature resonances are from Petkova *et al.* (BMRB entry 18127),<sup>13</sup> Paravastu *et al.* (BMRB entry 18129),<sup>14</sup> Lu *et al.* (BMRB entry 19009),<sup>15</sup> Bertini *et al.*,<sup>16</sup> and Lopez del Amo *et al.*<sup>17</sup> The spectrum of diMA $\beta$  RFs particularly overlaps with the cross-peaks of conformer 1 of Lopez del Amo *et al.*, but also with those of Bertini *et al.*, Petkova *et al.*, and Paravastu *et al.*, suggesting structural similarity of the diMA $\beta$  RF polymorph investigated here with the A $\beta$ 40 RF polymorphs of these studies.

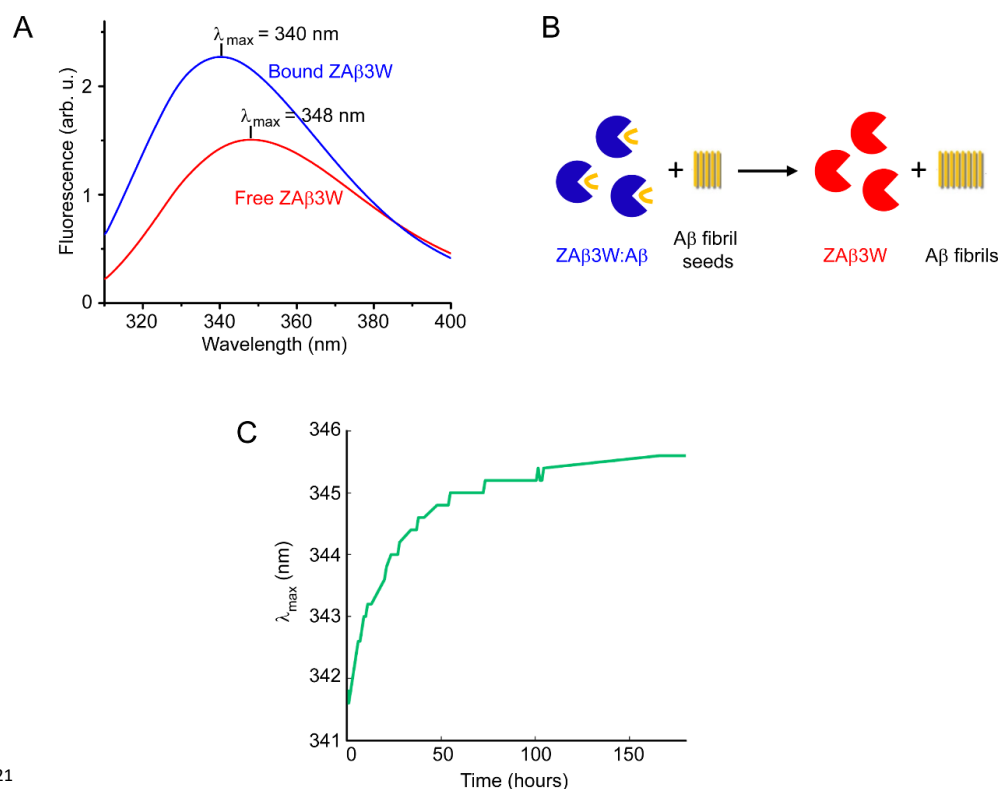

**Figure S3. DimA $\beta$  possesses higher thermodynamic stability in the RF state than in the ZA $\beta$ <sub>3</sub>-bound state.** (A) ZA $\beta$ 3W, a tryptophan-containing version of ZA $\beta$ 3, is a probe for the stability of A $\beta$  assembly states.<sup>6</sup> The fluorescence emission spectrum of ZA $\beta$ 3W exhibits a blue shift upon binding of A $\beta$  and can therefore report on dissociation of A $\beta$  monomers from A $\beta$  assemblies. (B) Scheme of the experiment to compare the thermodynamic stability of dimA $\beta$  in the ZA $\beta$ <sub>3</sub>-bound and RF state. 15  $\mu$ M preformed dimA $\beta$ :ZA $\beta$ 3W complex was incubated over one week in the presence of 48  $\mu$ M (in monomer equivalents) sonicated dimA $\beta$  RF seeds and the wavelength of maximum tryptophan fluorescence emission was recorded as described previously.<sup>6</sup> (C) The wavelength of maximum tryptophan fluorescence emission exhibits a red shift, indicating that dimA $\beta$  dissociates from the dimA $\beta$ :ZA $\beta$ 3W complex and is incorporated into RFs.

### Kinetic Model of Competing Oligomer and Fibril Pathways

Our formalism for the transition from sigmoidal to biphasic growth upon crossing the COC builds on the model of Powers and Powers.<sup>22</sup> Their original model has two assembly pathways: (1) on-pathway assembly leads to RF formation, and (2) off-pathway assembly generating gOs. We include both pathways in our model. Along the on-pathway, the fibril nucleation barrier is represented by unfavorable association constants for monomer addition up to  $n=5$  (nucleus size). Note that the reaction rates can be adjusted to fit the model to the data when a nucleus size smaller or larger than 5 is considered. The reaction from nucleus to RF is irreversible (note that  $b_2 = 0$ ). The unstructured oligomer growth is treated as unstable aggregates that may grow to some specified maximum size,  $m$  (we take  $m=8$ ), and follow the off-pathway that essentially buffers the monomer concentration temporarily. This, for now, neglects subsequent assembly of gOs in CFs.

To replicate our observations, we make four key changes to the model by Powers and Powers. (1) We use rate constants that are significantly smaller than those in (Powers and Powers 2008).<sup>22</sup> (2) In the original model, the same on-rate for monomer addition was used along the entire on-pathway, while the off-rate below and above the nucleus size were different. In our model, both the on- and off rates ( $a_1$  vs.  $a$ , and  $b_1$  vs.  $b$  in Fig. S4) are different for aggregates that are smaller than the nucleus size and RFs. (3) We included a secondary nucleation mechanism, as proposed by Knowles et al.<sup>3,4,23,24</sup> where already formed RFs facilitate nucleation of new seeds (blue arrows,  $k_2$  binding constant in Fig. S4). This was necessary to replicate the sharp autocatalytic rise in the experimental ThT fluorescence upon RFs nucleation. (4) To incorporate the lack of gO formation below the COC and the dependence of experimental gO growth rates on monomer concentration, we replicated the increase in off-pathway assembly rates seen in experiment (see Fig. 4C, insert). With these changes, the amount of different species in the solution are given by the following rate equations.

$$\frac{d[X_1]}{dt} = -[X_1](2a_1[X_1] + a_1 \sum_{j=2}^n [Y_j] + a[F^{(0)}]) + 2b_1[Y_2] + b_1 \sum_{j=3}^n [Y_j] + c[F^{(0)}] - [X_1](2\alpha_1[X_1] + \alpha \sum_{j=2}^m [Z_j]) + 2\beta[Z_2] + \beta \sum_{j=3}^m [Z_j] - k_2 n [X_1]^n [F^{(1)}] \quad (1)$$

$$\frac{d[Y_2]}{dt} = (a_1[X_1]^2 - b_1[Y_2]) - (a_1[X_1][Y_2] - b_1[Y_3]) \quad (2)$$

$$\frac{d[Y_j]}{dt} = (a_1[X_1][Y_{j-1}] - b_1[Y_j]) - (a_1[X_1][Y_j] - b_1[Y_{j+1}]), j=3,4. \quad (3)$$

$$\frac{d[Y_n]}{dt} = (a_1[X_1][Y_{n-1}] - b_1[Y_n]) - a[X_1][Y_n] + k_2 [X_1]^n [F^{(1)}] \quad (4)$$

$$\frac{d[Z_2]}{dt} = (\alpha_1[X_1]^2 - \beta [Z_2]) - (\alpha[X_1][Z_2] - \beta[Z_3]) \quad (5)$$

$$\frac{d[Z_j]}{dt} = (\alpha[X_1][Z_{j-1}] - \beta[Z_j]) - (\alpha[X_1][Z_j] - \beta[Z_{j+1}]), j=3,4,\dots,7. \quad (6)$$

$$\frac{d[Z_m]}{dt} = (\alpha_1[X_1][Z_{m-1}] - \beta[Z_m]) \quad (7)$$

$$\frac{d[F^{(0)}]}{dt} = a[X_1][Y_n] \quad (8)$$

$$\frac{d[F^{(1)}]}{dt} = (n + 1)a[X_1][Y_n] + a[X_1][F^{(0)}] - c[F^{(0)}], \quad (9)$$

where  $[X_1]$ ,  $[Y_j]$ ,  $[Z_j]$ ,  $[F^{(0)}]$ , and  $[F^{(1)}]$  represent the concentration of monomers, i-mers along the on-pathway, j-mers along the off-pathway, the RF number concentration, and the amount of monomers incorporated in RFs respectively in  $\mu\text{M}$ . The last term in eqs (1 – 5) each corresponds to secondary nucleation of new fibrils catalyzed by already established ones. The rate constants,  $a$ ,  $b_1$ ,  $c$ , and  $\beta$  are fixed at  $1.98 \times 10^{11} \text{ M}^{-1}\text{hr}^{-1}$ ,  $3.96 \times 10^{-4} \text{ hr}^{-1}$ ,  $7.2 \times 10^2 \text{ hr}^{-1}$ , and  $3.6 \times 10^{-2} \text{ hr}^{-1}$  respectively. The on rate,  $\alpha_1$ , is given by  $7.2 \times 10^{10} \times f([X_1], [NaCl])$  (in  $\text{M}^{-1}\text{hr}^{-1}$ ), where  $f([X_1], [NaCl])$  is given by the following equation

$$f([X_1], [NaCl]) = \frac{1}{1 + \exp^{(COC - [X_1])/0.5}}$$

$$COC = 3.522e^{-[NaCl]/45.3107} + 45.3107$$

where COC is the critical oligomer concentration. This assures that the oligomer reaction only becomes significant upon crossing the COC. In the model, the primary and secondary nucleation rates  $\alpha_1$  and  $k_2$  are varied over the range  $6.336 \text{ M}^{-1}\text{hr}^{-1} - 10.296 \text{ M}^{-1}\text{hr}^{-1}$  and  $3.6 \times 10^{-15} \text{ M}^{-1}\text{hr}^{-1} - 5.04 \times 10^{-10} \text{ M}^{-1}\text{hr}^{-1}$  to obtain the best fit for fibril and aggregation growth with varying initial monomer concentration. The rate constant  $\alpha$  is varied between  $72.0 \text{ M}^{-1}\text{hr}^{-1} - 1.728 \times 10^3 \text{ M}^{-1}\text{hr}^{-1}$  to stay consistent with the power law behavior of the initial slope of gOs growth curve as a function of monomer concentration.

Representative time traces from the model with initial monomer concentration below and above the COC are shown in Figure S4B. In order to compare the theoretical mass concentrations to experimental ThT kinetics, we measured a slope of 125 ThT units /  $1 \mu\text{M}$  RF for our plate reader. Based on our earlier measurements, the ThT response of gO/CFs was taken to be ten-fold weaker than that of RFs.<sup>8</sup>

**A**

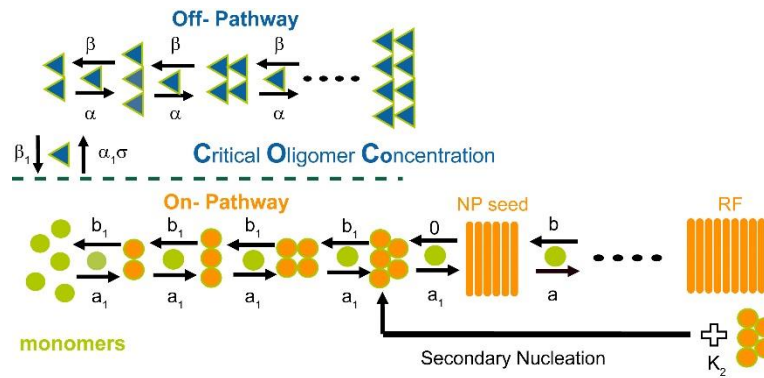

**B**

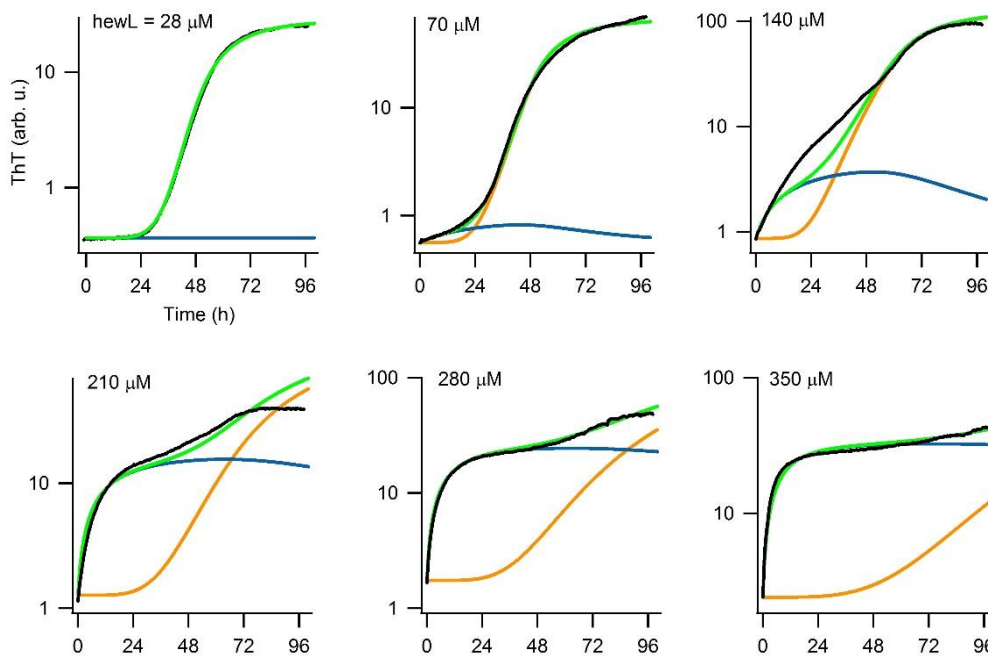

**Figure S4:** (A) Diagram of on- and off-pathways in the kinetic model. The on-pathway is displayed using orange symbols, where in addition to primary nucleation, secondary nucleation contributes to RF seed formation. Within the on-pathway, monomers (green) associate, forming pre-fibrillar multimers (orange) until eventually reaching a nucleus size (orange bars) consisting of  $n$  monomers. Beyond this specified nucleus, fibril growth begins. Already existing fibrils catalyze the formation of new ones through secondary nucleation with rate constant  $K_2$ . On the off-pathway monomers form gOs, but can only do so once monomer concentrations cross the COC. This limits the pool of monomers available for gO growth (indicated by using triangles instead of spheres) (B) Comparison of simulated with experimental kinetics. Experimental observed time-traces (black) showing ThT kinetics in response to the presence of hewl gOs and RFs and theoretical fits (green) plotted alongside their contributions from gOs (blue) and RFs (orange) concentrations at the indicated total monomer concentrations. ThT increases are in arbitrary units but account for the 10-fold smaller ThT response to equivalent mass concentrations from gO/CFs vs. RFs.

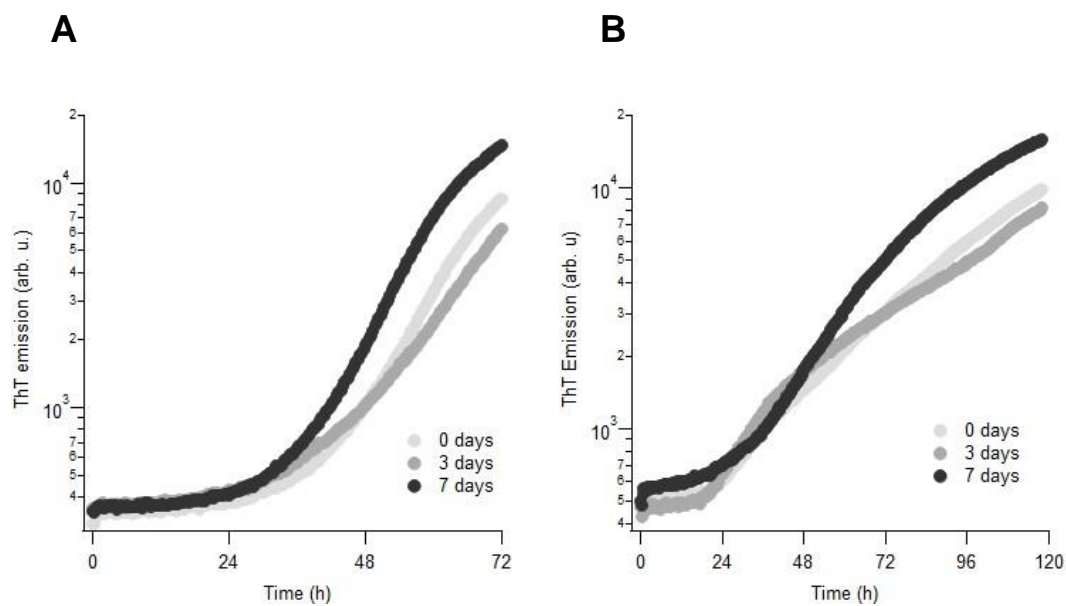

**Figure S5: Effect of hewL pre-hydrolysis on RF nucleation and growth.** HewL monomers, either freshly prepared or pre-hydrolyzed for 3 or 7 days, were incubated at (A) 30 uM hewL and 350 mM NaCl or (B) 350 uM and 100 mM NaCl in the presence of 15 uM ThT. Both are RF growth conditions, but at more than 10-fold different protein concentrations. As shown, pre-hydrolysis did not affect the RF lag periods in our system. Some acceleration in RF elongation occurred during the latter parts of the incubation periods, and only for the 7 day pre-hydrolyzed sample. This suggests that hewL hydrolysis, under our growth conditions, is not the cause of RF nucleation but can accelerate RF elongation rates at the late-stages of growth.

## References

1. B. Macao, W. Hoyer, A. Sandberg, A.-C. Brorsson, C. M. Dobson and T. Härd, *BMC Biotechnol.*, 2008, **8**, 82.
2. T. Miti, M. Mulaj, J. D. Schmit and M. Muschol, *Biomacromolecules*, 2015, **16**, 326-335.
3. T. P. J. Knowles, C. A. Waudby, G. L. Devlin, S. I. A. Cohen, A. Aguzzi, M. Vendruscolo, E. M. Terentjev, M. E. Welland and C. M. Dobson, *Science*, 2009, **326**, 1533-1537.
4. S. I. A. Cohen, M. Vendruscolo, M. E. Welland, C. M. Dobson, E. M. Terentjev and T. P. J. Knowles, *J. Chem. Phys.*, 2011, **135**, 065105.
5. E. A. Mirecka, H. Shaykhalishahi, A. Gauhar, Ş. Akgül, J. Lecher, D. Willbold, M. Stoldt and W. Hoyer, *Angew. Chem. Int. Ed.*, 2014, **53**, 4227-4230.
6. C. S. R. Grüning, S. Klinker, M. Wolff, M. Schneider, K. Toksöz, A. N. Klein, L. Nagel-Steger, D. Willbold and W. Hoyer, *J. Biol. Chem.*, 2013, **288**, 37104-37111.
7. E. T. Powers and D. L. Powers, *Biophys. J.*, 2008, **94**, 379-391.
8. J. Foley, S. E. Hill, T. Miti, M. Mulaj, M. Ciesla, R. Robeel, C. Persichilli, R. Raynes, S. Westerheide and M. Muschol, *J. Chem. Phys.*, 2013, **139**, 121901/121901-121912.
9. F. Delaglio, S. Grzesiek, G. W. Vuister, G. Zhu, J. Pfeifer and A. Bax, *J. Biomol. NMR*, 1995, **6**, 277-293.
10. W. F. Vranken, W. Boucher, T. J. Stevens, R. H. Fogh, A. Pajon, M. Llinas, E. L. Ulrich, J. L. Markley, J. Ionides and E. D. Laue, *Proteins*, 2005, **59**.
11. R. Freeman and G. A. Morris, *J. Am. Chem. Soc.*, 1979, **101**, 760-762.
12. H. Heise, W. Hoyer, S. Becker, O. C. Andronesi, D. Riedel and M. Baldus, *Proc. Natl. Acad. Sci. USA*, 2005, **102**, 15871-15876.
13. A. T. Petkova, W. M. Yau and R. Tycko, *Biochemistry*, 2006, **45**, 498-512.
14. A. K. Paravastu, R. D. Leapman, W. M. Yau and R. Tycko, *Proc. Natl. Acad. Sci. USA*, 2008, **105**, 18349-18354.
15. J. X. Lu, W. Qiang, W. M. Yau, C. D. Schwieters, S. C. Meredith and R. Tycko, *Cell*, 2013, **154**, 1257-1268.
16. I. Bertini, L. Gonnelli, C. Luchinat, J. Mao and A. Nesi, *J. Am. Chem. Soc.*, 2011, **133**, 16013-16022.
17. J. M. Lopez del Amo, M. Schmidt, U. Fink, M. Dasari, M. Fandrich and B. Reif, *Angew. Chem. Int. Ed. Engl.*, 2012, **51**, 6136-6139.
18. Z. Fu, D. Aucoin, J. Davis, W. E. Van Nostrand and S. O. Smith, *Biochemistry*, 2015, **54**, 4197-4207.
19. A. Lomakin, D. S. Chung, G. B. Benedek, D. A. Kirschner and D. B. Teplow, *Proc. Natl. Acad. Sci. USA*, 1996, **93**, 1125-1129.
20. L. M. Luheshi, W. Hoyer, T. P. de Barros, I. van Dijk Härd, A.-C. Brorsson, B. Macao, C. Persson, D. C. Crowther, D. A. Lomas, S. Ståhl, C. M. Dobson and T. Härd, *PLoS Biol.*, 2010, **8**, e1000334.
21. M. Nick, Y. Wu, N. W. Schmidt, S. B. Prusiner, J. Stöhr and W. F. DeGrado, *Biopolymers*, 2018, e23096.
22. E. T. Powers and D. L. Powers, *Biophys J*, 2008, **94**, 379-391.
23. S. I. A. Cohen, M. Vendruscolo, C. M. Dobson and T. P. J. Knowles, *J. Chem. Phys.*, 2011, **135**, 065106/065101-065118.
24. S. I. A. Cohen, S. Linse, L. M. Luheshi, E. Hellstrand, D. A. White, L. Rajah, D. E. Otzen, M. Vendruscolo, C. M. Dobson and T. P. J. Knowles, *Proceedings of the National Academy of Sciences*, 2013, **110**, 9758-9763.
